# Supplementary material for: Barriers to apply cardiovascular prediction rules in primary care: a postal survey
Source: BMC Fam Pract. 2007 Jan 3;8:1. doi: 10.1186/1471-2296-8-1 (PMC1766351; doi:10.1186/1471-2296-8-1)
Supplement: Additional file 1 — Questionnaire: Potential barriers for application of cardiovascular prediction rules. For descriptive purposes questions are sorted according to dimensions. Labelling of dimensions was not visible for participating physicians. [file 1471-2296-8-1-S1.pdf]

Additional file 1:

**Questionnaire: Potential barriers for application of cardiovascular prediction rules.** For descriptive purposes questions are sorted according to dimensions. Labelling of dimensions was not visible for participating physicians.

|                                                                                                                                    |
|------------------------------------------------------------------------------------------------------------------------------------|
| <b>Why I “rarely” or “never” apply prediction rules:</b>                                                                           |
| <b>Overall:</b><br><br>The results of prediction rules are often not helpful for decision making in practice                       |
| <b>1) Domain “Lack of knowledge”:</b>                                                                                              |
| I cannot keep track of all existing prediction rules and do not know which one to choose.                                          |
| I do not know the difference between prediction rules and guidelines.                                                              |
| I do not know any prediction rule.                                                                                                 |
| <b>2.1) Domain “Distrust in the validity of instruments”:</b>                                                                      |
| A single risk value does not take into account the complex situation of the patient.                                               |
| I know my patients thoroughly and can estimate their global risk correctly without a prediction rule.                              |
| Prediction rules do not contain risk factors, which are important in my opinion (like occupational factors, stress, or obesity).   |
| I use information from single risk factors for decision-making (like hypertension or hyperlipidemia); thus I know how to treat.... |

Additional file 1: **Potential barriers for application of cardiovascular prediction rules** (continued):

|                                                                                                                                      |
|--------------------------------------------------------------------------------------------------------------------------------------|
| I cannot apply prediction rules due to the special patient selection (like ethnic minorities, or groups with social deprivation).    |
| I do not trust prediction rules (I remember persons with a low risk who experienced a myocardial infarction...).                     |
| The predictive accuracy of prediction rules is not high enough.                                                                      |
| <b>2.2) Domain “Distrust in stakeholders”:</b>                                                                                       |
| The results of prediction rules may lead to over-treatment (like over-use of statins).                                               |
| I do not know which stakeholders or interest groups were engaged in the development of prediction rules.                             |
| I am afraid of misuse of prediction rules (like external control by health insurances or health authorities).                        |
| <b>2.3) Domain “Distrust in the concept of prevention”:</b>                                                                          |
| Prevention is of no use (if someone does not change life style anyway, he will not do this with “risk information”; bad compliance). |
| Even if prevention may be useful for single persons, total costs of the health care system will not be reduced.                      |
| <b>3) Domain “Aspects of practicability”:</b>                                                                                        |
| Application of prediction rules and patient counselling is time consuming.                                                           |
| I do not know if patients want to know their individual risk at all.                                                                 |
| I have ethical concerns.                                                                                                             |
| For risk estimation specific lipid values are necessary, which I do not determine in my office.                                      |

Additional file 1: **Potential barriers for application of cardiovascular prediction rules** (continued):

|                                                                                                                                   |
|-----------------------------------------------------------------------------------------------------------------------------------|
| <b>4) Open ended question:</b>                                                                                                    |
| Are there other reasons why you never or rarely use prediction rules? If yes, please write these reasons down in the space below. |
